# Supplementary material
Source: PubMed Central journal article supplement (PMC2911348)
Supplement: supp_M110.128470_jbc.M110.128470-1.pdf [file supp_M110.128470_jbc.M110.128470-1.pdf]

**Table S1. Data collection and refinement statistics.**

| <i>Data collection</i>                                  | Native                                                | Phasing<br>UO <sub>2</sub> (C <sub>2</sub> H <sub>3</sub> O <sub>2</sub> ) <sub>2</sub> | Native                     | SeMet                      |
|---------------------------------------------------------|-------------------------------------------------------|-----------------------------------------------------------------------------------------|----------------------------|----------------------------|
| Number of crystals                                      | 1                                                     | 1                                                                                       | 1                          | 1                          |
| Space group                                             | <i>P</i> 2 <sub>1</sub> 2 <sub>1</sub> 2 <sub>1</sub> | <i>P</i> 2 <sub>1</sub> 2 <sub>1</sub> 2 <sub>1</sub>                                   | <i>P</i> 4 <sub>1</sub> 22 | <i>P</i> 4 <sub>1</sub> 22 |
| Wavelength (Å)                                          | 0.9551                                                | 0.9551                                                                                  | 0.9551                     | 0.9786                     |
| Cell dimensions, <i>a</i> , <i>b</i> , <i>c</i> (Å)     | 63.1, 116.0, 123.0                                    | 63.2, 116.8, 123.4                                                                      | 77.4, 77.4, 108.6          | 76.1, 76.1, 110.7          |
| α, β, γ (°)                                             | 90, 90, 90                                            | 90, 90, 90                                                                              | 90, 90, 90                 | 90, 90, 90                 |
| Resolution range (Å) <sup>a</sup>                       | 25-2.50(2.59-2.50)                                    | 44-3.10(3.21-3.10)                                                                      | 25-3.05(3.16-3.05)         | 40-4.20(4.35-4.20)         |
| Unique reflections <sup>a</sup>                         | 31805                                                 | 17206                                                                                   | 6699                       | 4552                       |
| Degrees of data (°)                                     | 286                                                   | 471                                                                                     | 286                        | 309                        |
| Completeness (%) <sup>a</sup>                           | 99.1 (97.4)                                           | 99.9 (99.4)                                                                             | 99.3(98.0)                 | 99.8 (100.0)               |
| <i>R</i> <sub>sym</sub> (%) <sup>a</sup>                | 6.1 (66.2)                                            | 16.5                                                                                    | 8.4 (49.1)                 | 8.7 (29.9)                 |
| Mn ( <i>I</i> / <i>σ</i> ) <sup>a</sup>                 | 16.3 (2.0)                                            | 14.6 (1.9)                                                                              | 19.3 (2.7)                 | 22.4 (8.4)                 |
| Redundancy <sup>a</sup>                                 | 7.3 (5.1)                                             | 16.3 (12.6)                                                                             | 13.7 (9.6)                 | 12.8 (12.7)                |
| Wilson plot <i>B</i> -factor (Å <sup>2</sup> )          | 68                                                    | 89                                                                                      | 109                        | 139                        |
| Phasing power (acentrics)                               |                                                       |                                                                                         |                            |                            |
| Isomorphous                                             |                                                       | 0.83                                                                                    |                            |                            |
| Anomalous                                               |                                                       | 0.18                                                                                    |                            |                            |
| Figure of Merit (centrics)<br>(to 4.02Å)                |                                                       | 0.22 (0.37)                                                                             |                            |                            |
| Figure of Merit (acentrics)<br>(to 4.02Å)               |                                                       | 0.14 (0.30)                                                                             |                            |                            |
| <b><i>Refinement</i></b>                                |                                                       |                                                                                         |                            |                            |
| Resolution range (Å) <sup>a</sup>                       | 25-2.50(2.56-2.50)                                    |                                                                                         | 25-3.05(3.12-3.05)         |                            |
| <i>R</i> <sub>factor</sub> (%) <sup>a</sup>             | 22.9 (30.2)                                           |                                                                                         | 27.8 (34.9)                |                            |
| Free <i>R</i> <sub>factor</sub> (%) <sup>a</sup>        | 28.8 (40.1)                                           |                                                                                         | 29.3 (41.5)                |                            |
| Residue range built                                     | A:15-212<br>B: 1-210<br>C:10-210<br>D: 8-210          |                                                                                         | 14-210                     |                            |
| Free <i>R</i> reflections (%)                           | 5.1                                                   |                                                                                         | 4.9                        |                            |
| Free <i>R</i> reflections, no. <sup>a</sup>             | 1600 (101)                                            |                                                                                         | 316 (30)                   |                            |
| No. non-hydrogen protein atoms                          | 6655                                                  |                                                                                         | 1630                       |                            |
| No. water molecules                                     | 70                                                    |                                                                                         | 0                          |                            |
| <b><i>Model quality</i></b>                             |                                                       |                                                                                         |                            |                            |
| RMSD bond lengths (Å)                                   | 0.008                                                 |                                                                                         | 0.006                      |                            |
| RMSD bond angles (°)                                    | 1.106                                                 |                                                                                         | 0.881                      |                            |
| Mean <i>B</i> -factors                                  |                                                       |                                                                                         |                            |                            |
| Overall (Å <sup>2</sup> )                               | 79.3                                                  |                                                                                         | 146.5                      |                            |
| Protein atoms, (Å <sup>2</sup> )                        | 79.5                                                  |                                                                                         | 146.5                      |                            |
| Protein atoms NTD,(N-69) (Å <sup>2</sup> )              | 58.7                                                  |                                                                                         | 132.9                      |                            |
| Protein atoms αE-EF linker<br>(70-97) (Å <sup>2</sup> ) | 80.0                                                  |                                                                                         | 148.5                      |                            |
| Protein atoms FAT,(98-C) (Å <sup>2</sup> )              | 90.1                                                  |                                                                                         | 152.5                      |                            |
| Water (Å <sup>2</sup> )                                 | 63.2                                                  |                                                                                         | -                          |                            |
| Ramachandran plot (%)                                   | 92.5 / 7.5 / 0                                        |                                                                                         | 90.4 / 9.5 / 0             |                            |
| favored / allowed / disallowed                          |                                                       |                                                                                         |                            |                            |

<sup>a</sup>Parentheses indicate the highest-resolution shell.
